# Supplementary material for: Polymerization-induced self-assembly of liquid crystalline ABC triblock copolymers with long solvophilic chains
Source: Royal Society of Chemistry journal article supplement (doi:10.1039/c8py00643a), 2018-01-01
Supplement: c8py00643a1.pdf [file c8py00643a1.pdf]

## **Polymerization-induced self-assembly of liquid crystalline ABC triblock copolymers with long solvophilic chain**

Meng Huo,<sup>a,b,1</sup> Zhengyi Wan,<sup>a,1</sup> Min Zeng,<sup>a</sup> Yen Wei,<sup>\*,b</sup> and Jinying Yuan<sup>\*,a</sup>

<sup>a</sup> Key Lab of Organic Optoelectronics and Molecular Engineering of Ministry of Education, Department of Chemistry, Tsinghua University, 100084, Beijing, China.

E-Mail: yuanjy@mail.tsinghua.edu.cn

<sup>b</sup> Key Lab of Bioorganic Phosphorus Chemistry & Chemical Biology of Ministry of Education, Department of Chemistry, Tsinghua University, 100084, Beijing, China.

E-Mail: weiyen@tsinghua.edu.cn

<sup>1</sup> M. Huo and Z. Wan contributed equally.

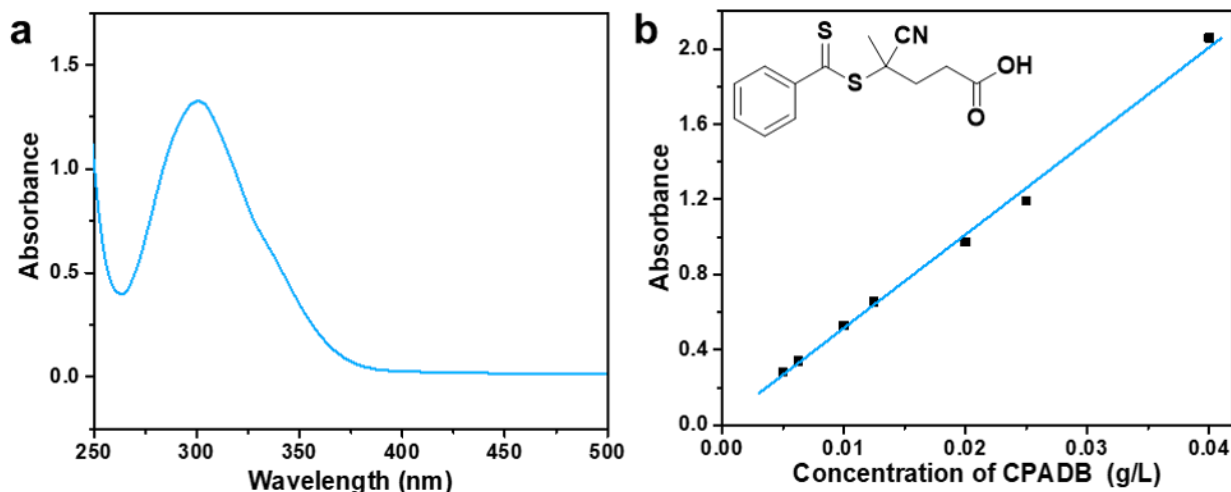

**Fig. S1.** a) Ultraviolet–visible spectrum of PDMA<sub>72</sub> solution (solvent: THF; concentration: 1.0 mg mL<sup>-1</sup>). b) Absorbance of gradient solutions of CPADB in THF at 301 nm.

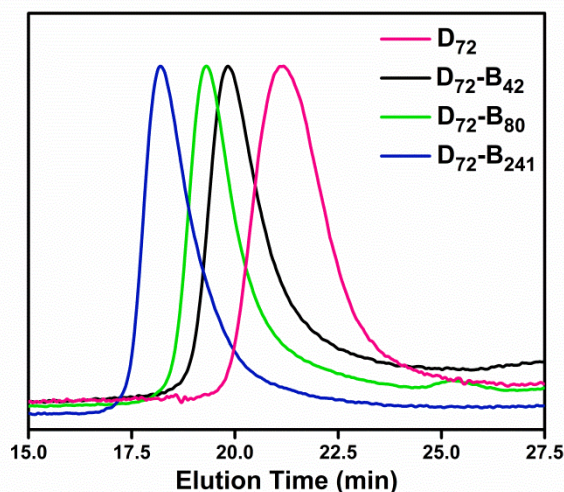

**Fig. S2.** SEC trace of PDMA<sub>72</sub> and D<sub>72</sub>-B<sub>x</sub> (x = 42, 80, 241) copolymers.

**Table S1.** Molecular and size characteristics of diblock copolymers D<sub>72</sub>-B<sub>x</sub>.

| Entry                             | Molar feed ratio (BzMA/PDMA) | DP <sub>BzMA</sub> <sup>a</sup> | Monomer conversion <sup>b</sup> | $M_{n, SEC}$ /kDa <sup>c</sup> | $\bar{D}$ <sup>d</sup> | Diameter /nm <sup>e</sup> | PDI <sup>e</sup> |
|-----------------------------------|------------------------------|---------------------------------|---------------------------------|--------------------------------|------------------------|---------------------------|------------------|
| D <sub>72</sub> -B <sub>42</sub>  | 50                           | 42                              | 83%                             | 10.8                           | 1.22                   | 23.35                     | 0.130            |
| D <sub>72</sub> -B <sub>80</sub>  | 100                          | 80                              | 83%                             | 16.2                           | 1.19                   | 29.94                     | 0.037            |
| D <sub>72</sub> -B <sub>241</sub> | 250                          | 241                             | 96%                             | 33.6                           | 1.23                   | 56.98                     | 0.056            |

<sup>a</sup> Determined by <sup>1</sup>H NMR spectra;

<sup>b</sup> Calculated by <sup>1</sup>H NMR spectra;

<sup>c</sup> Characterized by SEC;

<sup>d</sup>  $\bar{D} = M_w/M_n$ ;

<sup>e</sup> Hydrodynamic diameter measured by DLS.

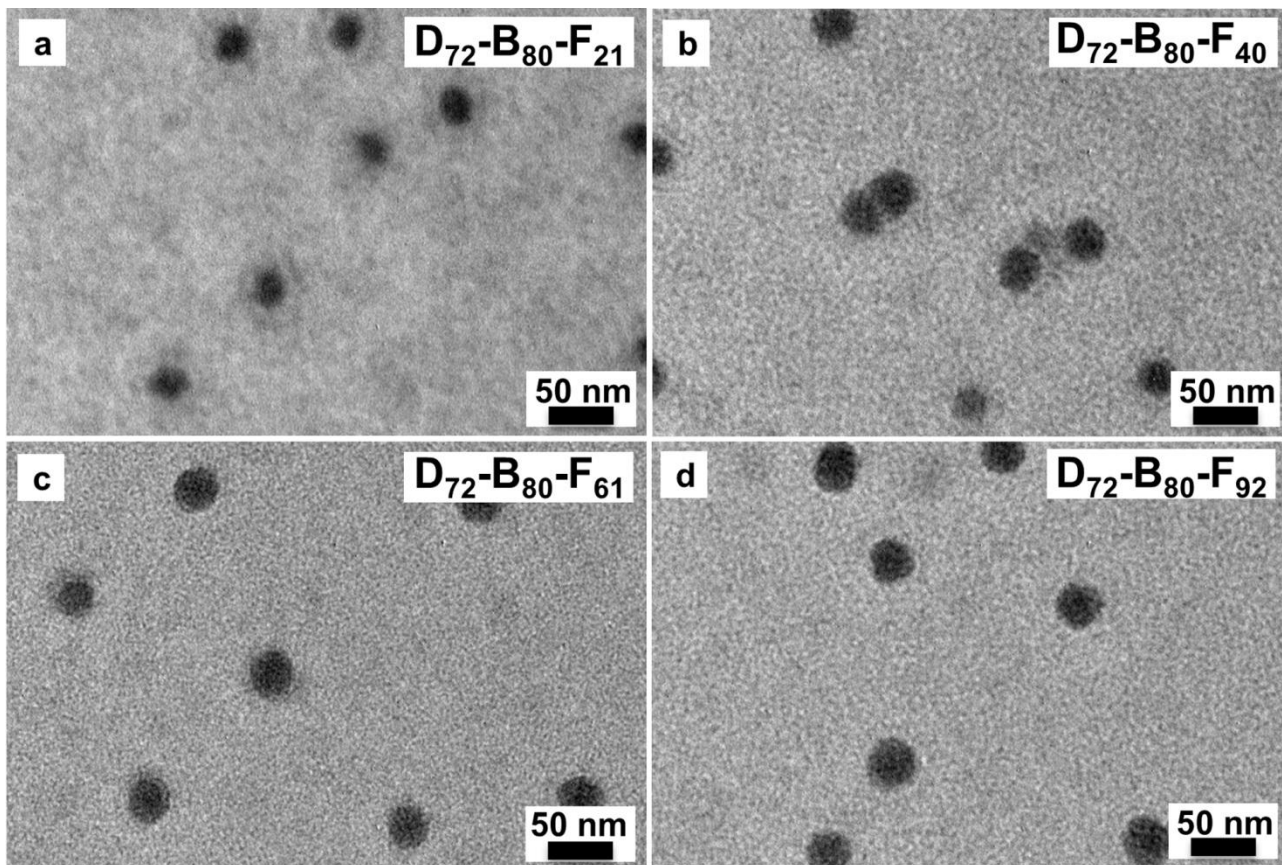

**Fig. S3.** TEM images of a)  $D_{72}-B_{80}-F_{21}$ , b)  $D_{72}-B_{80}-F_{40}$ , c)  $D_{72}-B_{80}-F_{61}$ , and d)  $D_{72}-B_{80}-F_{92}$  assemblies unstained.

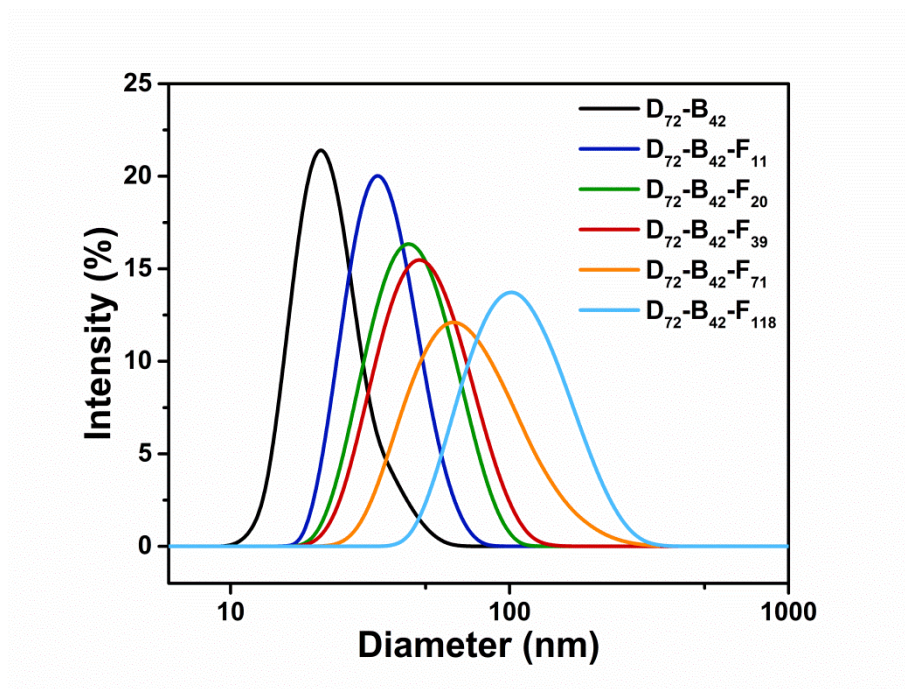

**Fig. S4.** DLS characterization of  $D_{72}-B_{42}$  and  $D_{72}-B_{42}-F_y$  ( $y = 11, 20, 39, 71, 118$ ) assemblies in ethanol.

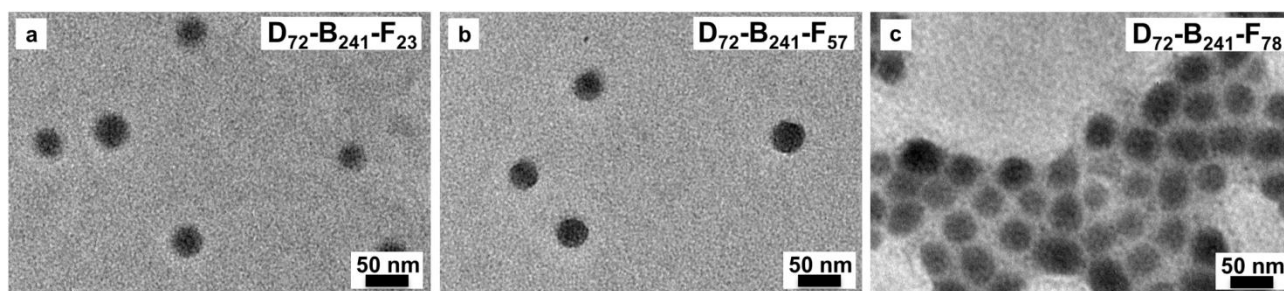

**Fig. S5.** TEM images of a)  $D_{72}\text{-}B_{241}\text{-}F_{23}$ , b)  $D_{72}\text{-}B_{241}\text{-}F_{57}$  and c)  $D_{72}\text{-}B_{241}\text{-}F_{78}$  assemblies unstained.
